# Supplementary material
Source: ML conference proceedings conference paper supplement (https://openaccess.thecvf.com/content/cvpr_2015/html/Straub_Small-Variance_Nonparametric_Clustering_2015_CVPR_paper.html)
Supplement: Supplementary file 2 [file Straub_Small-Variance_Nonparametric_Clustering_2015_CVPR_supplemental.zip]

Archive with 2 entries (2 files):
- DDPvMFmeansComparison.mp4
- 0440-supp.pdf
